# Supplementary material for: Ambient Environmental Ozone and Variation of Fractional Exhaled Nitric Oxide (FeNO) in Hairdressers and Healthcare Workers
Source: MDPI journal article supplement (doi:10.3390/ijerph20054271), 2023-02-28
Supplement: s1 [file s1]

# **Ambient Environmental Ozone and Variation of Fractional Exhaled Nitric Oxide (FeNO) in Hairdressers and Healthcare Workers**

**Tonje Trulssen Hildre, Hilde Heiro, Ingvill Sandven and Bato Hammarström \***

Environmental and Occupational Medicine, Department of Pulmonary Medicine, Division of Medicine, Oslo University Hospital, 0424 Oslo, Norway

\* Correspondence: bato.hammarstrom@ous-hf.no

## Supplementary Information File

Supplement S1. Test for instrument repeatability. Measurements are FeNO values in ppb.

|               | Test person 1 | Test person 2 | Test person 3 | Test person 4 |
|---------------|---------------|---------------|---------------|---------------|
| Measurement 1 | 10            | 15            | 8             | 33            |
| Measurement 2 | 11            | 14            | 10            | 24            |
| Measurement 3 | 10            | 14            | 9             | 28            |
| Measurement 4 | 11            | 13            | 11            | 24            |
| Measurement 5 | 10            | 15            | 11            | 26            |
| Mean          | 10.40         | 14.20         | 9.80          | 27.00         |
| SD            | 0.49          | 0.75          | 1.17          | 3.35          |
| CV            | 0.05          | 0.05          | 0.12          | 0.12          |

## Supplementary Information File

Supplement S2. Daily average air quality measurements including PM<sub>2.5</sub>, PM<sub>10</sub>, ozone, NO<sub>2</sub> and SO<sub>2</sub>.

\*Negative SO<sub>2</sub> indicates very low or zero levels of pollutant.

| September 17 <sup>th</sup> -24 <sup>th</sup> (Week 37-39) |                   |                   |                   |       |                   |                   |
|-----------------------------------------------------------|-------------------|-------------------|-------------------|-------|-------------------|-------------------|
| Date                                                      | PM <sub>2.5</sub> | PM <sub>10</sub>  | Ozone             | Ozone | NO <sub>2</sub>   | SO <sub>2</sub> * |
|                                                           | µg/m <sup>3</sup> | µg/m <sup>3</sup> | µg/m <sup>3</sup> | ppb   | µg/m <sup>3</sup> | µg/m <sup>3</sup> |
| Saturday Sep 17 <sup>th</sup>                             | 1.52              | 4.86              | 41.01             | 20.90 | 8.56              | -0.15             |
| Sunday Sep 18 <sup>th</sup>                               | 2.80              | 4.65              | 47.36             | 24.14 | 4.49              | -0.70             |
| Monday Sep 19 <sup>th</sup>                               | 1.73              | 4.26              | 52.38             | 26.69 | 4.87              | -0.42             |
| Tuesday Sep 20 <sup>th</sup>                              | 3.24              | 7.60              | 38.72             | 19.73 | 11.87             | -0.71             |
| Wednesday Sep 21 <sup>st</sup>                            | 5.13              | 11.95             | 20.30             | 10.35 | 20.94             | -0.81             |
| Thursday Sep 22 <sup>nd</sup>                             | 6.51              | 12.88             | 29.58             | 15.07 | 18.20             | -0.42             |
| Friday Sep 23 <sup>rd</sup>                               | 9.95              | 13.77             | 60.82             | 30.99 | 9.73              | -0.40             |
| Saturday Sep 24 <sup>th</sup>                             | 5.52              | 8.02              | 22.30             | 11.36 | 9.24              | -0.16             |
| Sunday Sep 25 <sup>th</sup>                               | 2.36              | 4.23              | 27.91             | 14.22 | 6.01              | 0.42              |
| Monday Sep 26 <sup>th</sup>                               | 1.99              | 3.11              | 55.28             | 28.17 | 6.04              | 1.11              |
| Tuesday Sep 27 <sup>th</sup>                              | 2.66              | 4.70              | 49.88             | 25.42 | 7.99              | 0.89              |
| Wednesday Sep 28 <sup>th</sup>                            | 6.20              | 10.36             | 54.45             | 27.75 | 6.33              | 0.14              |
| Thursday Sep 29 <sup>th</sup>                             | 5.39              | 9.06              | 36.14             | 18.42 | 9.51              | -0.04             |

# Supplementary Information File

Supplement S3. Anonymized FeNO measurements (Day FeNO S/E) in ppb. After commuting and arriving at workplace (S). After ≥3 h work (E). Mean with correcting for symptoms (Mean-S). SD with correcting for symptoms (SD-S).

| Week 38 Hairdressers FeNO S/ E |       |       |       |       |       |       |       |       |       |       |       |       |
|--------------------------------|-------|-------|-------|-------|-------|-------|-------|-------|-------|-------|-------|-------|
|                                | M S   | M E   | T S   | T E   | W S   | W E   | T S   | T E   | F S   | F E   | S S   | SE    |
|                                | 8     | 9     | 8     | 6     | 10    | 8     | 7     | 9     | 7     | 8     | 11    | 14    |
|                                | 9     | 10    | 8     | 9     | 11    | 9     | 10    | 10    | 8     | 10    | 16    | 15    |
|                                | 12    | 11    | 13    | 13    | 13    | 13    | 10    | 11    | 9     | 10    | 16    | 17    |
|                                | 12    | 11    | 15    | 14    | 14    | 14    | 10    | 12    | 12    | 10    | 23    | 20    |
|                                | 15    | 13    | 18    | 17    | 14    | 14    | 11    | 12    | 14    | 15    |       |       |
|                                | 20    | 18    | 19    | 19    | 16    | 15    | 12    | 16    | 14    | 15    |       |       |
|                                | 23    | 20    | 22    | 21    | 17    | 19    | 15    | 16    | 15    | 17    |       |       |
|                                | 23    | 20    | 22    | 22    | 21    | 19    | 15    | 17    | 16    | 21    |       |       |
|                                | 25    | 22    | 22    | 22    | 21    | 21    | 16    | 18    | 18    | 21    |       |       |
|                                | 26    | 24    | 24    |       | 21    | 21    | 16    | 23    | 20    | 22    |       |       |
|                                | 27    | 27    |       |       | 24    | 23    | 23    | 23    | 22    | 24    |       |       |
|                                |       |       |       |       | 25    | 24    | 23    | 26    | 28    | 24    |       |       |
|                                |       |       |       |       |       |       |       |       | 41    | 42    |       |       |
| Mean                           | 18.18 | 16.82 | 17.10 | 15.89 | 17.25 | 16.67 | 14.00 | 16.08 | 17.23 | 18.38 | 16.50 | 16.50 |
| SD                             | 7.14  | 6.27  | 5.88  | 5.80  | 5.05  | 5.28  | 5.06  | 5.60  | 9.24  | 9.09  | 4.93  | 2.65  |
| Mean-S                         | 18.57 | 17.00 | 17.00 | 15.00 | 19.09 | 16.10 | 14.20 | 15.44 | 15.44 | 15.91 | 16.67 | 16.33 |
| SD-S                           | 6.86  | 5.78  | 5.51  | 5.16  | 5.93  | 4.85  | 5.14  | 4.66  | 6.83  | 5.59  | 6.03  | 3.21  |

  

| Week 39 Healthcare Workers FeNO S/ E |       |       |       |       |       |       |       |       |       |       |
|--------------------------------------|-------|-------|-------|-------|-------|-------|-------|-------|-------|-------|
|                                      | M S   | M E   | T S   | T E   | W S   | W E   | T S   | T E   | F S   | F E   |
|                                      | 7     | 7     | 9     | 6     | 9     | 5     | 8     | 9     | 8     | 6     |
|                                      | 9     | 9     | 11    | 9     | 9     | 6     | 11    | 11    | 8     | 8     |
|                                      | 9     | 9     | 12    | 12    | 11    | 10    | 12    | 14    | 8     | 12    |
|                                      | 10    | 11    | 12    | 13    | 12    | 11    | 12    | 14    | 10    | 13    |
|                                      | 10    | 12    | 12    | 13    | 13    | 13    | 13    | 15    | 11    | 13    |
|                                      | 12    | 13    | 13    | 13    | 13    | 13    | 13    | 15    | 13    | 13    |
|                                      | 12    | 13    | 13    | 14    | 15    | 15    | 14    | 15    | 13    | 14    |
|                                      | 12    | 16    | 14    | 15    | 17    | 16    | 19    | 15    | 13    | 14    |
|                                      | 14    | 16    | 14    | 15    | 18    | 17    | 20    | 18    | 14    | 16    |
|                                      | 15    | 18    | 15    | 16    | 18    | 20    | 21    | 22    | 17    | 19    |
|                                      | 16    | 20    | 17    | 18    | 22    | 22    | 25    | 26    | 17    | 23    |
|                                      | 18    | 20    | 20    | 20    | 25    | 23    | 27    | 37    | 19    | 28    |
|                                      | 18    | 22    | 31    | 23    | 26    | 24    | 45    | 41    | 25    | 30    |
|                                      | 22    | 24    | 32    | 26    | 35    | 40    |       |       | 30    | 36    |
|                                      | 34    | 41    |       |       |       |       |       |       |       |       |
| Mean                                 | 14.53 | 16.73 | 16.07 | 15.21 | 17.36 | 16.79 | 18.46 | 19.38 | 14.71 | 17.50 |
| SD                                   | 6.76  | 8.41  | 7.05  | 5.25  | 7.44  | 8.92  | 9.82  | 9.76  | 6.50  | 8.69  |
| Mean-S                               | 14.46 | 16.77 | 16.67 | 15.50 | 16.33 | 15.42 | 16.25 | 17.92 | 14.27 | 16.73 |
| SD-S                                 | 7.20  | 8.80  | 7.46  | 5.65  | 5.77  | 6.23  | 5.99  | 8.56  | 5.04  | 7.63  |

## Supplementary Information File

Supplement S4. Hairdressers FeNO measurements, sampling and commuting time. After commuting and arriving at workplace (FeNO S). After  $\geq 3$  h work (FeNO E). Distribution of data in histogram with normality tests.

| Hairdressers   |         |              |              |                 |                     |
|----------------|---------|--------------|--------------|-----------------|---------------------|
|                |         | FeNO S (ppb) | FeNO E (ppb) | Minutes between | Commuting total min |
| N              | Valid   | 62           | 61           | 61              | 62                  |
|                | Missing | 22           | 23           | 23              | 22                  |
| Mean           |         | 16.71        | 16.82        | 211.87          | 23.52               |
| Median         |         | 16.00        | 17.00        | 194.00          | 25.00               |
| Std. Deviation |         | 6.53         | 6.29         | 39.70           | 10.67               |
| Minimum        |         | 7            | 6            | 180             | 1                   |
| Maximum        |         | 41           | 42           | 337             | 55                  |

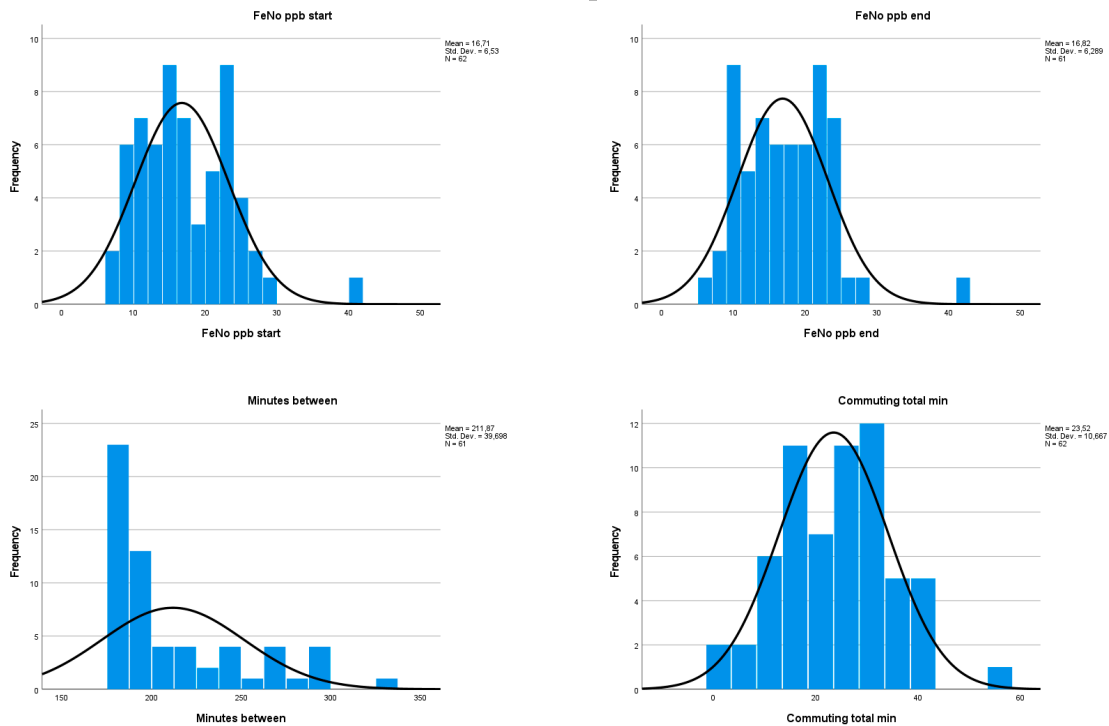

| Tests of Normality                                 |                                 |    |       |              |    |       |
|----------------------------------------------------|---------------------------------|----|-------|--------------|----|-------|
|                                                    | Kolmogorov-Smirnov <sup>a</sup> |    |       | Shapiro-Wilk |    |       |
|                                                    | Statistic                       | df | Sig.  | Statistic    | df | Sig.  |
| FeNO S                                             | .120                            | 61 | .028  | .939         | 61 | .004  |
| FeNO E                                             | .078                            | 61 | .200* | .929         | 61 | .002  |
| Minutes between                                    | .227                            | 61 | <.001 | .793         | 61 | <.001 |
| Commuting total min                                | .105                            | 61 | .095  | .974         | 61 | .215  |
| *. This is a lower bound of the true significance. |                                 |    |       |              |    |       |
| a. Lilliefors Significance Correction              |                                 |    |       |              |    |       |

## Supplementary Information File

Supplement S5. Healthcare workers FeNO measurements, sampling and commuting time. After commuting and arriving at workplace (FeNO S). After  $\geq 3$  h work (FeNO E). Distribution of data in histogram with normality tests.

| Healthcare workers |         |              |              |                         |                     |
|--------------------|---------|--------------|--------------|-------------------------|---------------------|
|                    |         | FeNO S (ppb) | FeNO E (ppb) | Minutes between samples | Commuting total min |
| N                  | Valid   | 70           | 70           | 70                      | 70                  |
|                    | Missing | 5            | 5            | 5                       | 5                   |
| Mean               |         | 16.17        | 17.09        | 220.04                  | 41.03               |
| Median             |         | 13.50        | 15.00        | 194.50                  | 30.00               |
| Std. Deviation     |         | 7.49         | 8.19         | 41.66                   | 28.02               |
| Minimum            |         | 7            | 5            | 180                     | 4                   |
| Maximum            |         | 45           | 41           | 317                     | 120                 |

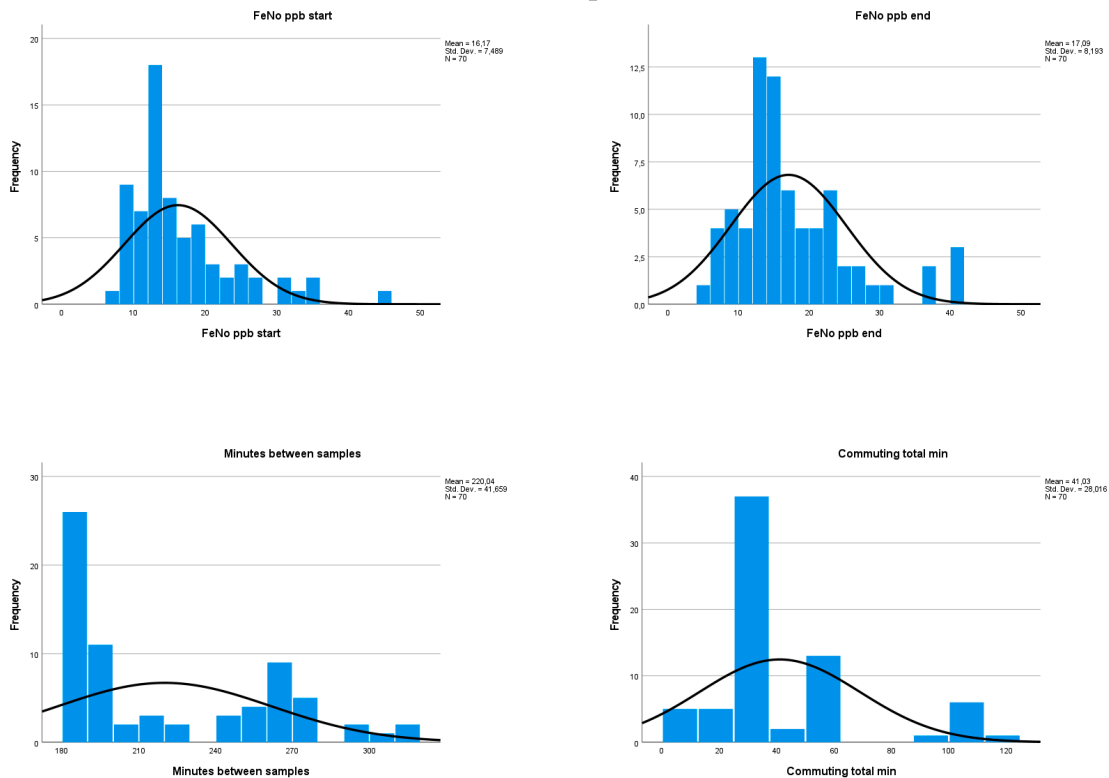

| Tests of Normality                    |                                 |    |       |              |    |       |
|---------------------------------------|---------------------------------|----|-------|--------------|----|-------|
|                                       | Kolmogorov-Smirnov <sup>a</sup> |    |       | Shapiro-Wilk |    |       |
|                                       | Statistic                       | df | Sig.  | Statistic    | df | Sig.  |
| FeNO S                                | .185                            | 70 | <.001 | .854         | 70 | <.001 |
| FeNO E                                | .181                            | 70 | <.001 | .882         | 70 | <.001 |
| Minutes between samples               | .247                            | 70 | <.001 | .833         | 70 | <.001 |
| Commuting total min                   | .310                            | 70 | <.001 | .809         | 70 | <.001 |
| a. Lilliefors Significance Correction |                                 |    |       |              |    |       |

# Supplementary Information File

Supplement S6. Hairdressers and healthcare workers symptoms, commuting and treatments. After commuting and arriving at workplace (FeNO S). After ≥3 h work (FeNO E). (n) represents the daily number of measurements in the FeNO S group. N=No and Y=Yes. \*P-values are calculated with Student's t-test, otherwise with Mann-Whitney test. ^Time in minutes.

|                    | n   | FeNO S | FeNO E | p-value | Sampling^ | Commuting^ | p-value S | p-value E |
|--------------------|-----|--------|--------|---------|-----------|------------|-----------|-----------|
| Symptoms           |     |        |        |         |           |            |           |           |
| Short of breath Y  | 0   |        |        |         |           |            |           |           |
| Fever Y            | 0   |        |        |         |           |            |           |           |
| Cough Y            | 10  | 22.50  | 23.10  | 0.984   | 221.8     | 27.1       | 0.303     | 0.431     |
| Cough N            | 122 | 15.95  | 16.45  | 0.446   | 215.8     | 33.3       |           |           |
| Cold Y             | 29  | 19.83  | 20.86  | 0.090*  | 203.9     | 22.0       | 0.018     | 0.004     |
| Cold N             | 103 | 15.49  | 15.95  | 0.536   | 219.7     | 36.0       |           |           |
| Commuting          |     |        |        |         |           |            |           |           |
| Pedestrian Y       | 64  | 17.36  | 17.91  | 0.131*  | 216.6     | 15.2       | 0.026     | 0.040     |
| Pedestrian N       | 68  | 15.54  | 16.06  | 0.469   | 215.8     |            |           |           |
| Bicycling Y        | 13  | 15.23  | 14.00  | 0.190*  | 216.4     | 41.5       | 0.601     | 0.110     |
| Bicycling N        | 119 | 16.55  | 17.29  | 0.331   | 216.2     |            |           |           |
| Public transport Y | 76  | 16.55  | 16.91  | 0.780   | 220.1     | 23.0       | 0.743     | 0.855     |
| Public transport N | 56  | 16.25  | 17.04  | 0.373   | 211.1     |            |           |           |
| Car Y              | 35  | 17.54  | 18.03  | 0.754   | 218.2     | 18.8       | 0.319     | 0.310     |
| Car N              | 97  | 16.02  | 16.57  | 0.592   | 215.5     |            |           |           |
| Smoking/vaping Y   | 6   | 16.17  | 16.50  | 0.375*  | 188.7     | 21.3       | 0.858     | 0.468     |
| Smoking/vaping N   | 126 | 16.44  | 16.98  | 0.468   | 217.6     | 33.4       |           |           |
| Treatments         |     |        |        |         |           |            |           |           |
| Bleach Y           | 29  | 14.55  | 14.83  | 0.292*  | 218.7     | 24.1       | 0.007*    | 0.009*    |
| Bleach N           | 33  | 18.78  | 18.63  | 0.415*  | 205.7     | 22.9       |           |           |
| Dyes Y             | 30  | 14.83  | 14.83  | 0.500*  | 220.5     | 24.0       | 0.014*    | 0.007*    |
| Dyes N             | 32  | 18.65  | 18.74  | 0.463*  | 203.5     | 23.9       |           |           |
| Permanent Y        | 1   | 15.00  | 13.00  |         | 294.0     | 25.0       |           |           |
| Permanent N        | 61  | 16.74  | 16.88  |         | 210.5     | 23.5       |           |           |
| Spray Y            | 35  | 17.63  | 17.46  | 0.349*  | 219.5     | 21.3       | 0.105*    | 0.181*    |
| Spray N            | 27  | 15.62  | 15.96  | 0.311*  | 201.6     | 26.3       |           |           |
| Other Y            | 12  | 18.92  | 16.83  | 0.054*  | 227.1     | 27.6       | 0.097*    | 0.497*    |
| Other N            | 50  | 16.24  | 16.82  | 0.119*  | 210.0     | 22.6       |           |           |
